# Supplementary material for: Hyaluronic Acid (HA), Platelet-Rich Plasm and Extracorporeal Shock Wave Therapy (ESWT) promote human chondrocyte regeneration in vitro and ESWT-mediated increase of CD44 expression enhances their susceptibility to HA treatment
Source: PubMed Central journal article supplement (PMC6599220; doi:10.1371/journal.pone.0218740), 2019-06-28
Supplement: pone.0218740.s001.pdf [file pone.0218740.s001.pdf]

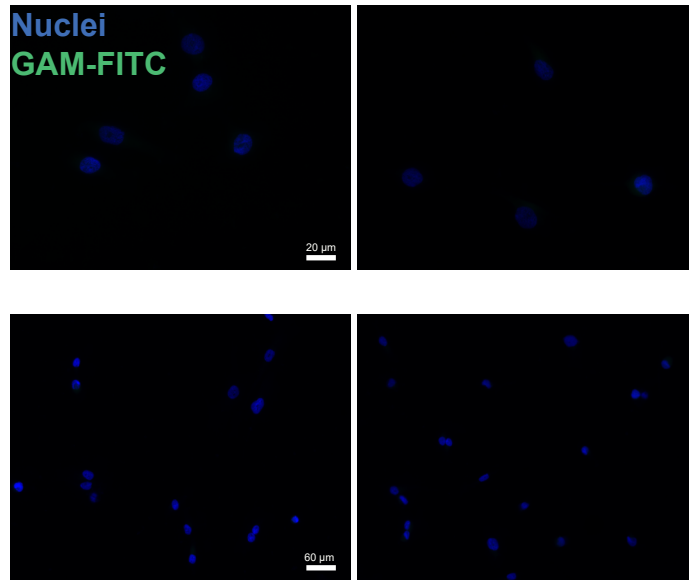

Supplementary Figure S1
